# Supplementary material for: Fe(CN)63− ion-modified MnO2/graphene nanoribbons enabling high energy density asymmetric supercapacitors
Source: Royal Society of Chemistry journal article supplement (doi:10.1039/c8ta01375f), 2018-01-01
Supplement: c8ta01375f1.pdf [file c8ta01375f1.pdf]

## Supporting Information

### **Fe(CN)<sub>6</sub><sup>3-</sup> Ions-Modified MnO<sub>2</sub>/Graphene Nanoribbons Enabling High Energy Density Asymmetric Supercapacitors**

Lizhi Sheng, Lili Jiang, Tong Wei, Qihang Zhou, Yuting Jiang, Zimu Jiang, Zheng Liu, and  
Zhuangjun Fan\*

*Key Laboratory of Superlight Materials and Surface Technology, Ministry of Education  
College of Material Science and Chemical Engineering, Harbin Engineering University,  
Harbin 150001, China*

\*Corresponding author. Tel. /fax: +86 451 82569890. E-mail address: [fanzhj666@163.com](mailto:fanzhj666@163.com) (Z. Fan)

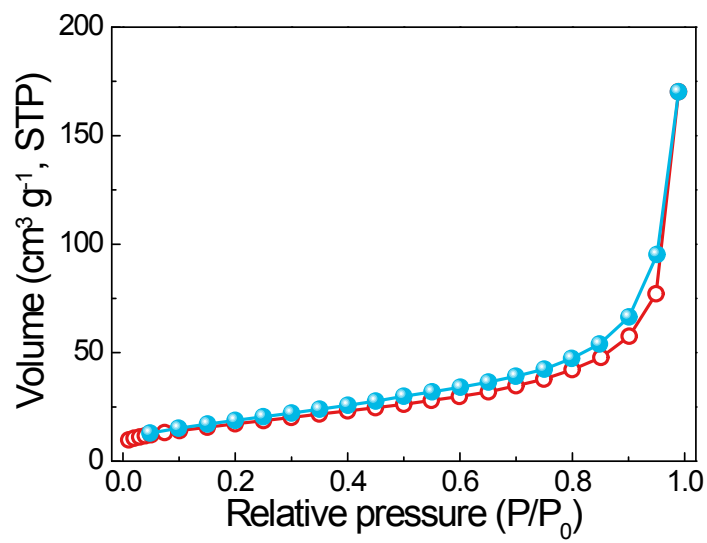

**Fig. S1.** Nitrogen adsorption and desorption isotherms of the MnO<sub>2</sub>/GR

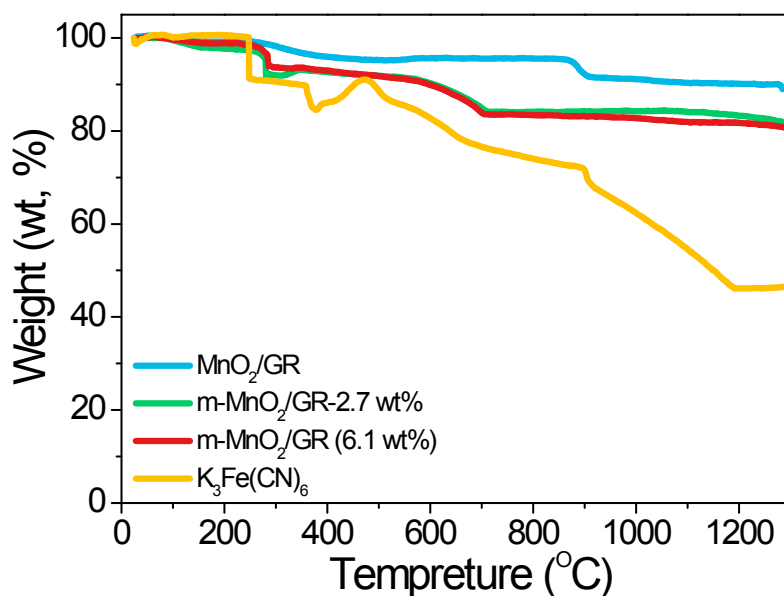

**Fig. S2.** TGA curves the m-MnO<sub>2</sub>/GR (6.1wt%), m-MnO<sub>2</sub>/GR-2.7wt%, MnO<sub>2</sub>/GR and K<sub>3</sub>Fe(CN)<sub>6</sub> in air with a temperature range from 25 to 1300 °C. For MnO<sub>2</sub>/GR TGA curve, the final product Mn<sub>3</sub>O<sub>4</sub> is 89.7.[1] From the TGA curve of m-MnO<sub>2</sub>/GR, if we assume that the total mass is 100, and the GR, MnO<sub>2</sub> and K<sub>3</sub>Fe(CN)<sub>6</sub> are x, y and z, respectively, combined with TGA curve of K<sub>3</sub>Fe(CN)<sub>6</sub>, the following formulas are true:

$$\begin{aligned}
 x + y + z &= 100 & x &= 4.7 \\
 y &= 19x & \text{The result is } y &= 89.2 \\
 0.87y + 0.465z &= 80.45 & z &= 6.1
 \end{aligned}$$

That is to say, the GR, MnO<sub>2</sub> and K<sub>3</sub>Fe(CN)<sub>6</sub> contents are 4.7, 89.2 and 6.1 wt%, respectively.

**Table S1.** Comparison of the m-MnO<sub>2</sub>/GR with previously reported MnO<sub>2</sub>-based electrodes in concern of the specific capacitance.

| Materials                                                  | Capacitance (F g <sup>-1</sup> ) | Ref.             |
|------------------------------------------------------------|----------------------------------|------------------|
| MnO <sub>2</sub> nanosheet                                 | 300                              | [2]              |
| MnO <sub>2</sub> nanowires                                 | 340                              | [3]              |
| Hierarchical porous C/MnO <sub>2</sub>                     | 392                              | [4]              |
| MnO <sub>2</sub> /C                                        | 288                              | [5]              |
| rGO/MnOx                                                   | 202                              | [6]              |
| MnO <sub>2</sub> /GO                                       | 297                              | [7]              |
| MnO <sub>2</sub> /Ti <sub>3</sub> C <sub>2</sub>           | 390                              | [8]              |
| Metal-organic framework structure (NiHCF)/MnO <sub>2</sub> | 224                              | [9]              |
| Manganese hexacyanoferrate/MnO <sub>2</sub>                | 225.6                            | [10]             |
| Ag/MnO <sub>2</sub>                                        | 198.9                            | [11]             |
| Silicon diatom@MnO <sub>2</sub>                            | 341.5                            | [12]             |
| Ni(OH) <sub>2</sub> /MnO <sub>2</sub> core-shell nanowires | 355                              | [13]             |
| <b>m-MnO<sub>2</sub>/GR</b>                                | <b>435</b>                       | <b>This work</b> |

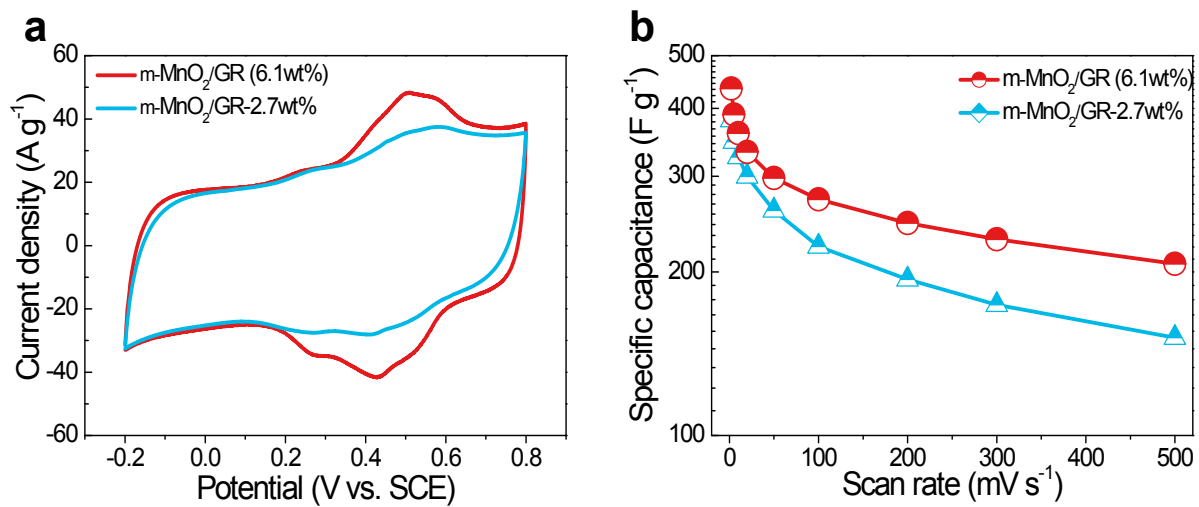

**Fig. S3.** (a) CV curves of the m-MnO<sub>2</sub>/GR (6.1wt%) and m-MnO<sub>2</sub>/GR-2.7wt% electrodes at 100 mV s<sup>-1</sup>. (b) Specific capacitances of the m-MnO<sub>2</sub>/GR (6.1 wt%) and m-MnO<sub>2</sub>/GR-2.7wt% electrodes.

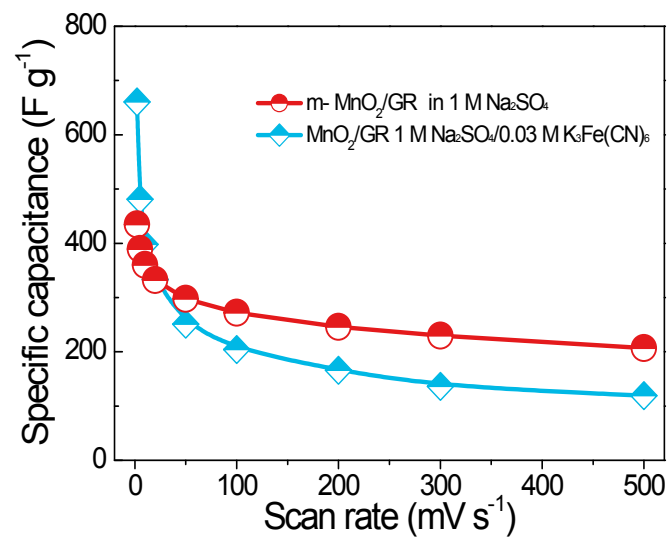

**Fig. S4.** Specific capacitances of the m-MnO<sub>2</sub>/GR electrode in 1 M Na<sub>2</sub>SO<sub>4</sub> electrolyte and MnO<sub>2</sub>/GR in 1 M Na<sub>2</sub>SO<sub>4</sub>/0.03 M K<sub>3</sub>Fe(CN)<sub>6</sub> electrolyte.

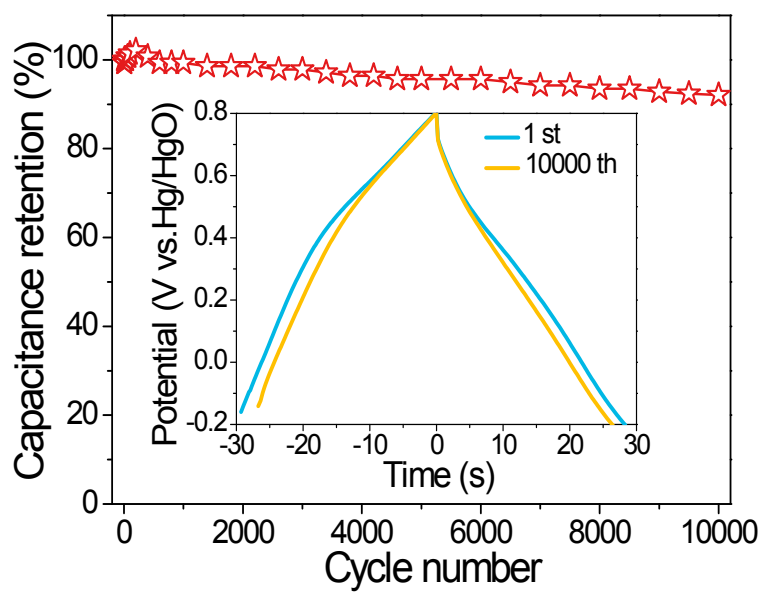

**Fig. S5.** Cycling performance of the m-MnO<sub>2</sub>/GR electrode measured at 20 A g<sup>-1</sup> for 10 000 cycles.

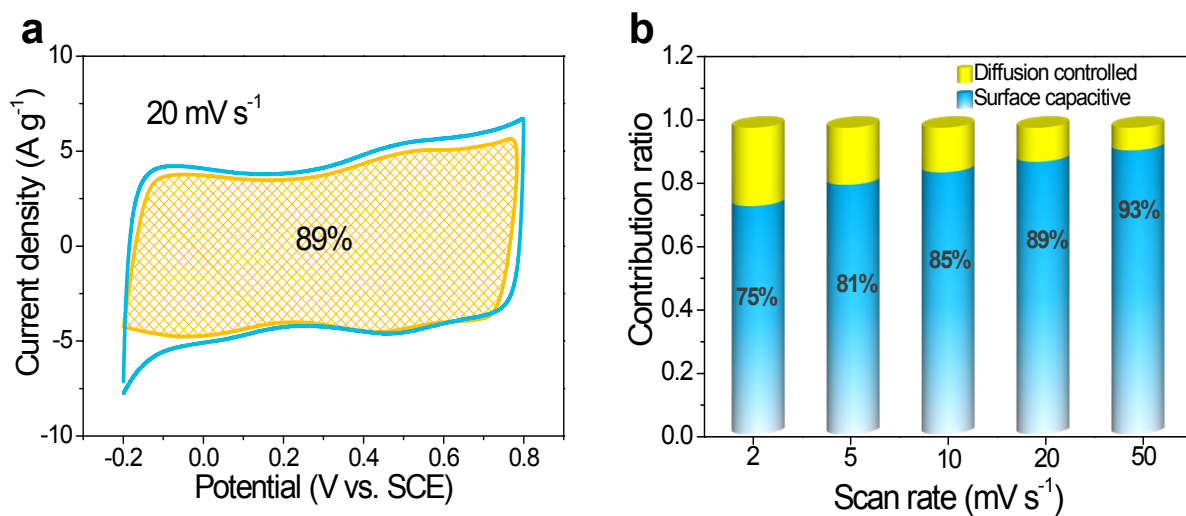

**Fig. S6.** (a) Separation of the capacitive (shaded region) and diffusion currents in the  $\text{MnO}_2/\text{GR}$  at a scan rate of  $20 \text{ mV s}^{-1}$ . (b) Contribution ratio of the diffusion-controlled and capacitance-controlled charges at different scan rates.



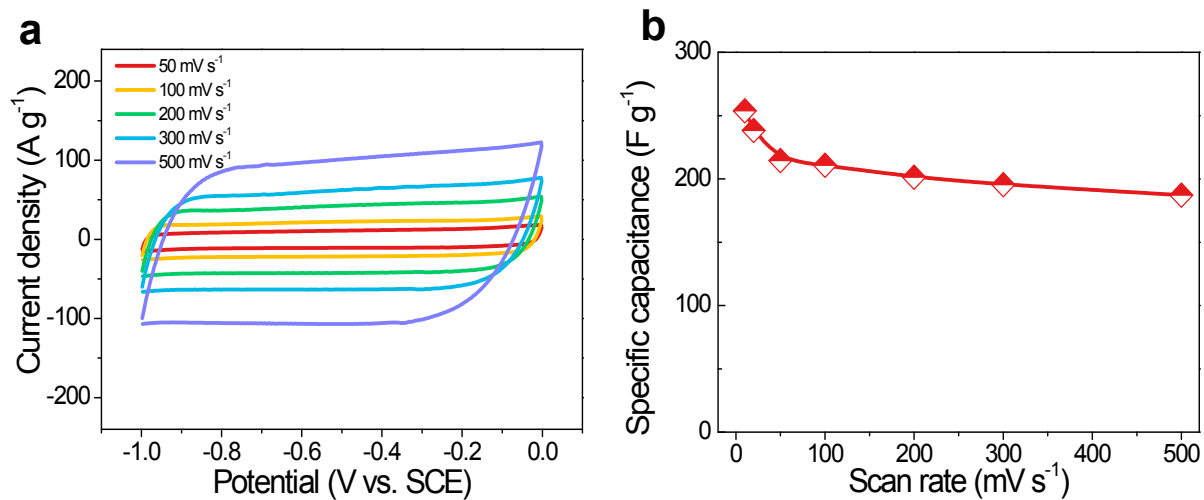

**Fig. S7.** Electrochemical performances of the GR electrode using a three-electrode cell in 1M Na<sub>2</sub>SO<sub>4</sub> electrolyte within a potential window of -1 to 0 V (vs. SCE). (a) CV curves of the GR at various scan rates in 1 M Na<sub>2</sub>SO<sub>4</sub> electrolyte. (b) Specific capacitances of the GR electrode.

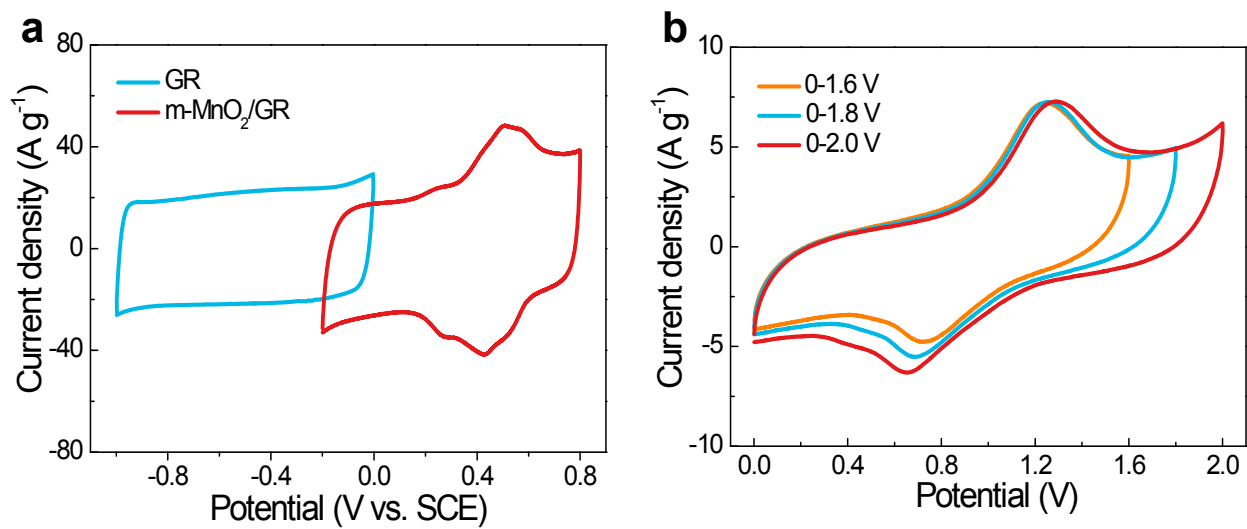

**Fig. S8.** (a) CV curves of the GR and m-MnO<sub>2</sub>/GR in a three-electrode cell at 100 mV s<sup>-1</sup>. (b) CV curves of m-MnO<sub>2</sub>/GR//GR ASC operated in different voltage windows at 50 mV s<sup>-1</sup>.

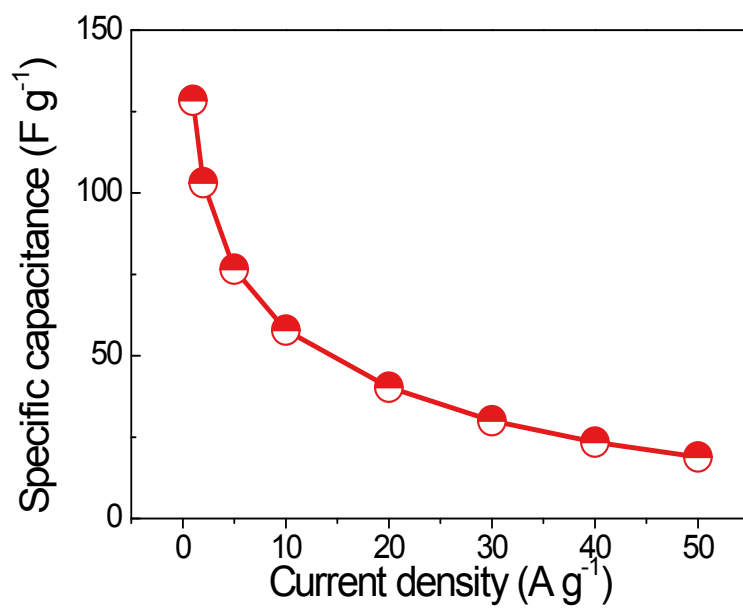

**Fig. S9.** Gravimetric specific capacitances of the m-MnO<sub>2</sub>/GR//GR ASC at various current densities ranging from 1 to 50 A g<sup>-1</sup>.

**Table S2.** Comparison of the m-MnO<sub>2</sub>/GR//GR ASC with previously reported MnO<sub>2</sub>-based ASCs in aqueous electrolytes.

| Electrode materials                                        |                                    | Electrolyte                          | Voltage<br>(V) | E<br>(Wh kg <sup>-1</sup> ) | P<br>(W kg <sup>-1</sup> ) | Ref. |
|------------------------------------------------------------|------------------------------------|--------------------------------------|----------------|-----------------------------|----------------------------|------|
| Anode                                                      | Cathode                            |                                      |                |                             |                            |      |
| N-doped hollow carbon spheres(NHCSs)                       | MnO <sub>2</sub> /NHCSs            | 1 M Na <sub>2</sub> SO <sub>4</sub>  | 1.8            | 26.8                        | 233                        | [4]  |
| Activated graphene oxide                                   | Si-diatom@MnO <sub>2</sub>         | 1 M Na <sub>2</sub> SO <sub>4</sub>  | 1.6            | 23.2                        | 120                        | [12] |
| TiO <sub>2</sub>                                           | MnO <sub>2</sub>                   | 1 M LiClO <sub>4</sub>               | 2.0            | 7.7                         | 762.5                      | [14] |
| Three-dimensional N-doped reduced graphene oxide (3D-NRGO) | MnO <sub>2</sub> /3D-NRGO          | 1 M Na <sub>2</sub> SO <sub>4</sub>  | 2.0            | 35.28                       | 200                        | [15] |
| Nitrogen-doped porous carbon                               | Porous carbon@MnO <sub>2</sub>     | 1 M Na <sub>2</sub> SO <sub>4</sub>  | 1.8            | 34.7                        | 1000                       | [16] |
| Hierarchical porous carbon (HPC)                           | MnO <sub>2</sub> /GO               | 1 M Na <sub>2</sub> SO <sub>4</sub>  | 2.0            | 46.7                        | 100                        | [7]  |
| Cross-linked carbon nanosheets (CCNs)                      | MnO <sub>2</sub> @CCNs             | 1 M Na <sub>2</sub> SO <sub>4</sub>  | 1.9            | 23.6                        | 188.8                      | [17] |
| Microwave exfoliated graphite oxide                        | MnO <sub>2</sub> nanosheets arrays | 1 M Na <sub>2</sub> SO <sub>4</sub>  | 1.6            | 25.8                        | 400                        | [18] |
| N-doped carbon                                             | MnO <sub>2</sub> /C                | 1 M Na <sub>2</sub> SO <sub>4</sub>  | 2.0            | 39.5                        | 200                        | [5]  |
| Polypyrrole(PPy)                                           | MnO <sub>2</sub>                   | 1 M Na <sub>2</sub> SO <sub>4</sub>  | 1.7            | 27.2                        | 850                        | [19] |
| p-BC/N-5M                                                  | p-BC@MnO <sub>2</sub> -2h          | 1 M Na <sub>2</sub> SO <sub>4</sub>  | 2.0            | 32.9                        | 285                        | [20] |
| Graphene/MoO <sub>3</sub>                                  | Graphene/MnO <sub>2</sub>          | 1 M Na <sub>2</sub> SO <sub>4</sub>  | 2.0            | 42.6                        | 276                        | [21] |
| CNT                                                        | MnO <sub>2</sub>                   | 1 M Na <sub>2</sub> SO <sub>4</sub>  | 2.0            | 47.4                        | 200                        | [22] |
| Graphene                                                   | Graphene/MnO <sub>2</sub>          | 1 M Na <sub>2</sub> SO <sub>4</sub>  | 2.0            | 30.4                        | 100                        | [23] |
| ACF                                                        | Graphene/MnO <sub>2</sub>          | 1 M Na <sub>2</sub> SO <sub>4</sub>  | 1.8            | 51.1                        | 102                        | [24] |
| Graphene hydrogel                                          | MnO <sub>2</sub>                   | 0.5M Na <sub>2</sub> SO <sub>4</sub> | 2.0            | 23.2                        | 1000                       | [25] |

| Electrode materials                |                                     | Electrolyte                             | Voltage<br>(V) | E<br>(Wh kg <sup>-1</sup> ) | P<br>(W kg <sup>-1</sup> ) | Ref.             |
|------------------------------------|-------------------------------------|-----------------------------------------|----------------|-----------------------------|----------------------------|------------------|
| Anode                              | Cathode                             |                                         |                |                             |                            |                  |
| Activated graphene                 | Activated graphene/MnO <sub>2</sub> | 1 M Na <sub>2</sub> SO <sub>4</sub>     | 2.0            | 24.3                        | 24500                      | [26]             |
| Carbon spheres                     | Carbon spheres/MnO <sub>2</sub>     | 1 M Na <sub>2</sub> SO <sub>4</sub>     | 2.0            | 22.1                        | 7000                       | [27]             |
| CNT/In <sub>2</sub> O <sub>3</sub> | CNT/MnO <sub>2</sub>                | 1 M Na <sub>2</sub> SO <sub>4</sub>     | 2.0            | 25.5                        | 30000                      | [28]             |
| E-CMG                              | E-CMG/MnO <sub>2</sub>              | 1 M Na <sub>2</sub> SO <sub>4</sub>     | 2.0            | 44                          | 11200                      | [29]             |
| CNT/V <sub>2</sub> O <sub>5</sub>  | MnO <sub>2</sub> /carbon            | 1 M Na <sub>2</sub> SO <sub>4</sub>     | 1.6            | 16                          | 75                         | [30]             |
| SWNTs                              | Graphene/MnO <sub>2</sub>           | 0.5M Na <sub>2</sub> SO <sub>4</sub>    | 1.5            | 12.5                        | 80000                      | [31]             |
| Graphene/Ag                        | Graphene/MnO <sub>2</sub>           | 1 M Na <sub>2</sub> SO <sub>4</sub>     | 1.8            | 50.8                        | 101.5                      | [32]             |
| AC                                 | AC/MnO <sub>2</sub>                 | 0.5M Na <sub>2</sub> SO <sub>4</sub>    | 1.8            | 10.4                        | 14700                      | [33]             |
| Graphene                           | Graphene/MnO <sub>2</sub>           | 1 M Na <sub>2</sub> SO <sub>4</sub>     | 1.7            | 21.3                        | 250                        | [34]             |
| AC                                 | MnO <sub>2</sub>                    | 2 M CaSO <sub>4</sub>                   | 2.0            | 22.5                        | 1000                       | [35]             |
| AC                                 | AC/MnO <sub>2</sub>                 | 0.5M Na <sub>2</sub> SO <sub>4</sub>    | 2.0            | 18.2                        | 10100                      | [36]             |
| <b>GR</b>                          | <b>m-MnO<sub>2</sub>/GR</b>         | <b>1 M Na<sub>2</sub>SO<sub>4</sub></b> | <b>1.8</b>     | <b>57.8</b>                 | <b>1200</b>                | <b>This work</b> |

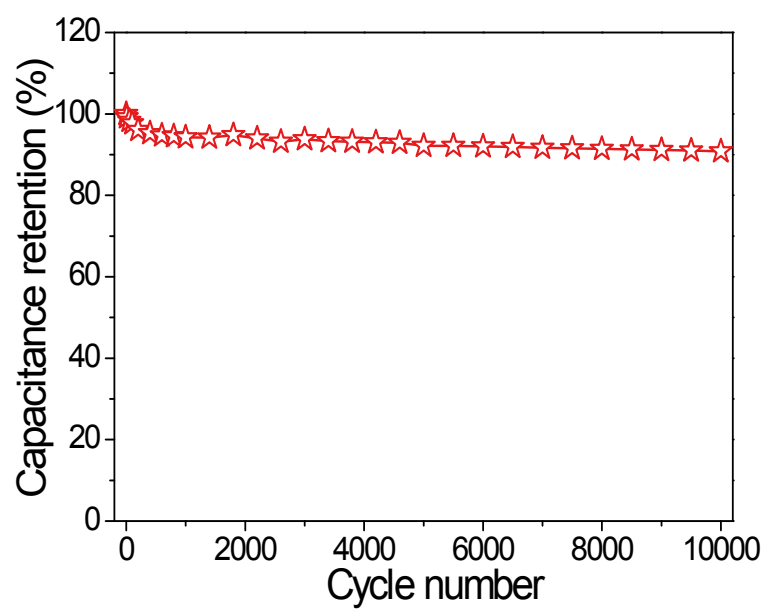

**Fig. S10.** Cycling performance of the MnO<sub>2</sub>/GR//GR ASC.

## References

1. Z. Liu, K. Xu, H. Sun and S. Yin, *Small*, 2015, **11**, 2182-2191.
2. P. Gao, P. Metz, T. Hey, Y. Gong, D. Liu, D. D. Edwards, J. Y. Howe, R. Huang and S. T. Misture, *Nat. Commun.*, 2017, **8**, 14559.
3. H. Lv, X. Gao, Q. Xu, H. Liu, Y. G. Wang and Y. Xia, *ACS Appl. Mater. Interfaces*, 2017, **9**, 40394-40403.
4. T. Liu, C. Jiang, W. You and J. Yu, *J. Mater. Chem. A*, 2017, **5**, 8635-8643.
5. Y. Dai, L. Chen, V. Babayan, Q. Cheng, P. Saha, H. Jiang and C. Li, *J. Mater. Chem. A*, 2015, **3**, 21337-21342.
6. Y. Wang, W. Lai, N. Wang, Z. Jiang, X. Wang, P. Zou, Z. Lin, H. J. Fan, F. Kang, C.-P. Wong and C. Yang, *Energy Environ. Sci.*, 2017, **10**, 941-949.
7. Y. Zhao, W. Ran, J. He, Y. Huang, Z. Liu, W. Liu, Y. Tang, L. Zhang, D. Gao and F. Gao, *Small*, 2015, **11**, 1310-1319.
8. W. Liu, Z. Wang, Y. Su, Q. Li, Z. Zhao and F. Geng, *Adv. Energy Mater.*, 2017, **7**, 1602834.
9. Y. Wang and Q. Chen, *ACS Appl. Mater. Interfaces*, 2014, **6**, 6196-6201.
10. Y. Wang, H. Zhong, L. Hu, N. Yan, H. Hu and Q. Chen, *J. Mater. Chem. A*, 2013, **1**, 2621.
11. S. Lu, D. Yan, L. Chen, G. Zhu, H. Xu and A. Yu, *Mater. Lett.*, 2016, **168**, 40-43.
12. Q. J. Le, T. Wang, D. N. H. Tran, F. Dong, Y. X. Zhang and D. Losic, *J. Mater. Chem. A*, 2017, **5**, 10856-10865.
13. H. Jiang, C. Li, T. Sun and J. Ma, *Chem. Commun.*, 2012, **48**, 2606-2608.

14. J. Gu, C. Jin, Z. Bian, X. Liu, S. Li, S. Tang and D. Yuan, *J. Nanopart. Res.*, 2017, **19**.
15. P. Wang, S. Sun, S. Wang, Y. Zhang, G. Zhang, Y. Li, S. Li, C. Zhou and S. Fang, *J. Appl. Electrochem.*, 2017, **47**, 1293-1303.
16. Y. Luan, Y. Huang, L. Wang, M. Li, R. Wang and B. Jiang, *J. Electroanal. Chem.*, 2016, **763**, 90-96.
17. Y. Li, N. Yu, P. Yan, Y. Li, X. Zhou, S. Chen, G. Wang, T. Wei and Z. Fan, *J. Power Sources*, 2015, **300**, 309-317.
18. M. Huang, X. L. Zhao, F. Li, L. L. Zhang and Y. X. Zhang, *J. Power Sources*, 2015, **277**, 36-43.
19. F. Grote and Y. Lei, *Nano Energy*, 2014, **10**, 63-70.
20. L. F. Chen, Z. H. Huang, H. W. Liang, Q. F. Guan and S. H. Yu, *Adv. Mater.*, 2013, **25**, 4746-4752.
21. J. Chang, M. Jin, F. Yao, T. H. Kim, V. T. Le, H. Yue, F. Gunes, B. Li, A. Ghosh, S. Xie and Y. H. Lee, *Adv. Funct. Mater.*, 2013, **23**, 5074-5083.
22. H. Jiang, C. Li, T. Sun and J. Ma, *Nanoscale*, 2012, **4**, 807-812.
23. Z.-S. Wu, W. Ren, D.-W. Wang, F. Li, B. Liu and H.-M. Cheng, *ACS Nano*, 2010, **4**, 5835-5842.
24. Z. Fan, J. Yan, T. Wei, L. Zhi, G. Ning, T. Li and F. Wei, *Adv. Funct. Mater.*, 2011, **21**, 2366-2375.
25. H. Gao, F. Xiao, C. B. Ching and H. Duan, *ACS Appl. Mater. Interfaces*, 2012, **4**, 2801-2810.
26. X. Zhao, L. Zhang, S. Murali, M. D. Stoller, Q. Zhang, Y. Zhu and R. S. Ruoff, *ACS*



- Nano*, 2012, **6**, 5404-5412.
27. Z. Lei, J. Zhang and X. S. Zhao, *J. Mater. Chem.*, 2012, **22**, 153-160.
  28. P.-C. Chen, G. Shen, Y. Shi, H. Chen and C. Zhou, *ACS Nano*, 2010, **4**, 4403-4411.
  29. B. G. Choi, M. Yang, W. H. Hong, J. W. Choi and Y. S. Huh, *ACS Nano*, 2012, **6**, 4020-4028.
  30. Z. Chen, Y. Qin, D. Weng, Q. Xiao, Y. Peng, X. Wang, H. Li, F. Wei and Y. Lu, *Adv. Funct. Mater.*, 2009, **19**, 3420-3426.
  31. G. Yu, L. Hu, M. Vosgueritchian, H. Wang, X. Xie, J. R. McDonough, X. Cui, Y. Cui and Z. Bao, *Nano Lett.*, 2011, **11**, 2905-2911.
  32. Y. Shao, H. Wang, Q. Zhang and Y. Li, *J. Mater. Chem. C*, 2013, **1**, 1245-1251.
  33. Y.-T. Wang, A.-H. Lu, H.-L. Zhang and W.-C. Li, *J. Phys. Chem. C*, 2011, **115**, 5413-5421.
  34. L. Deng, G. Zhu, J. Wang, L. Kang, Z.-H. Liu, Z. Yang and Z. Wang, *J. Power Sources*, 2011, **196**, 10782-10787.
  35. T. Tomko, R. Rajagopalan, M. Lanagan and H. C. Foley, *J. Power Sources*, 2011, **196**, 2380-2386.
  36. P.-C. Gao, A.-H. Lu and W.-C. Li, *J. Power Sources*, 2011, **196**, 4095-4101.
